# Supplementary material
Source: publisher figshare collection journal article supplement (https://frontiersin.figshare.com/ndownloader/files/12417170)
Supplement: Supplementary file [file 12417170]

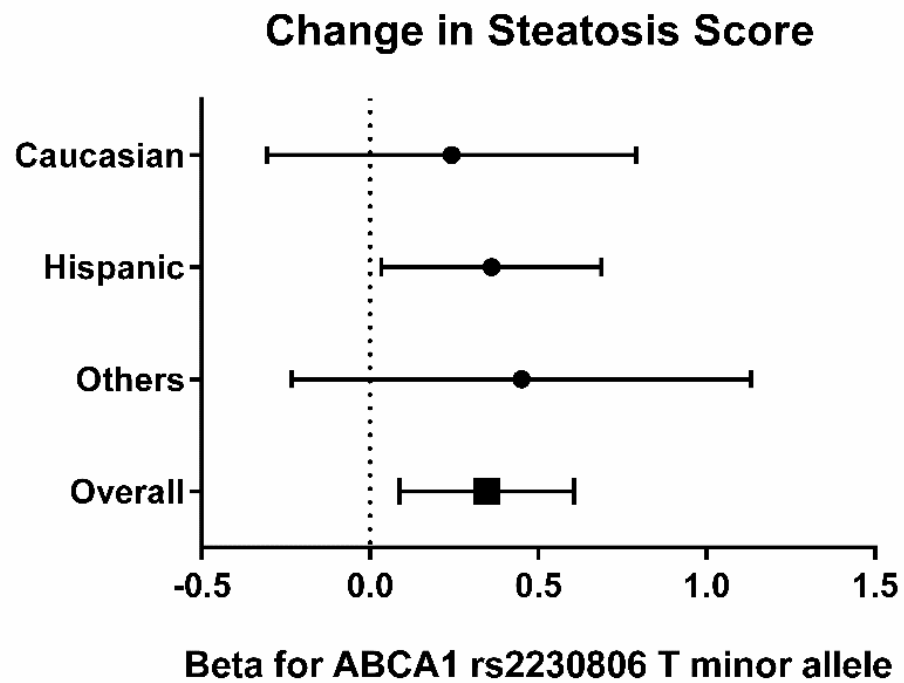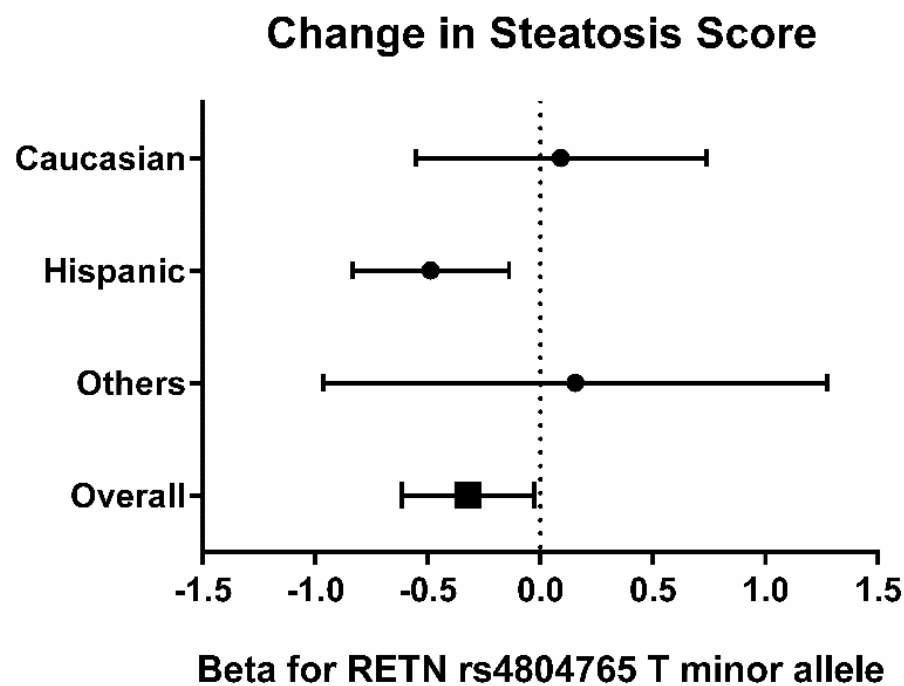

**Figure S2.** Forest plots of the top SNPs for steatosis. The analysis is adjusted for age, gender, and baseline steatosis score.
